# Supplementary material for: Zn-doped In2O3nanostructures: preparation, structure and gas-sensing properties
Source: Royal Society of Chemistry journal article supplement (doi:10.1039/c1ce06143g), 2011-11-21
Supplement: c1ce06143g.pdf [file c1ce06143g.pdf]

## Supporting Information

### **Zn-Doped In<sub>2</sub>O<sub>3</sub> nanostructures: preparation, structure and gas-sensor property**

Hongxiao Yang, Shuping Wang, Yanzhao Yang\*

Key Laboratory of Special Functional Aggregated Materials, Ministry of Education, School of Chemistry and Chemical Engineering, Shandong University, Jinan, 250100

\*Corresponding author

Tel: 86-531-88361391; Fax: 86-531-88564464

E-mail: [yzhyang@sdu.edu.cn](mailto:yzhyang@sdu.edu.cn)

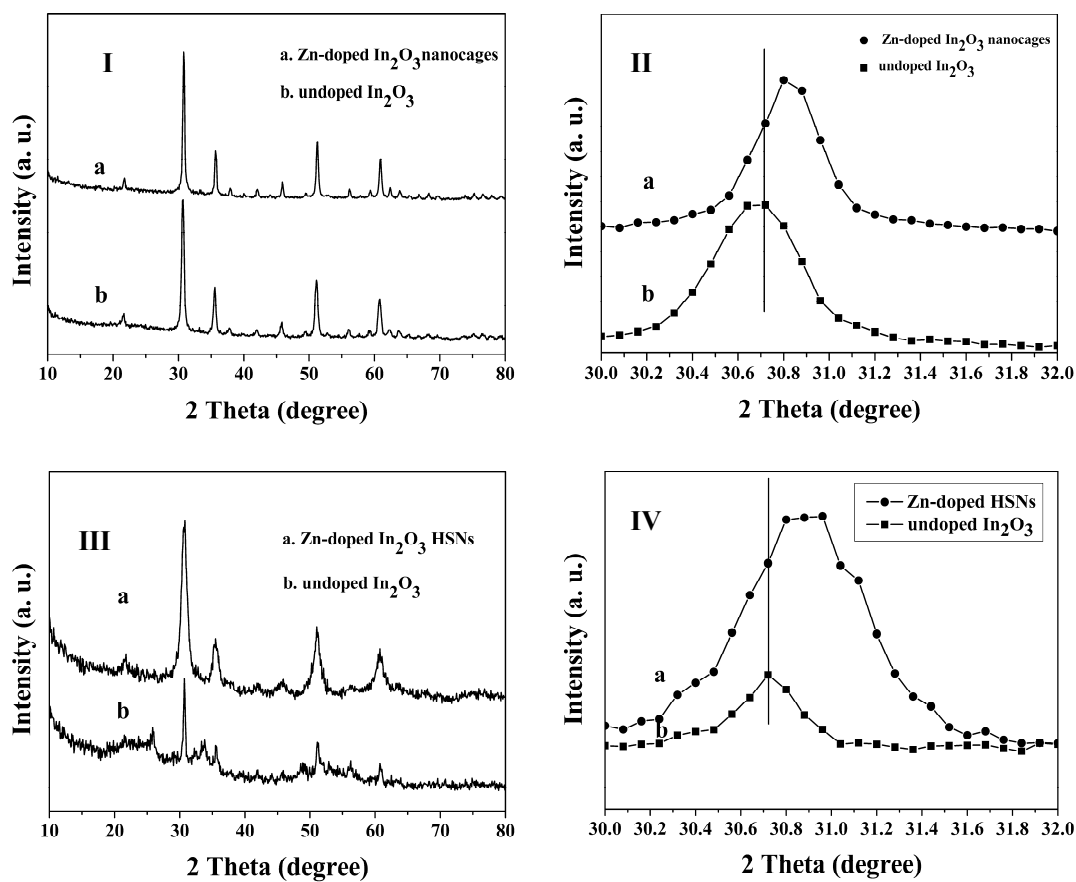

**Fig. S1** XRD pattern, (I) taken from both Zn-doped nanocages and undoped  $\text{In}_2\text{O}_3$  nanoparticles (II) enlarged view of the XRD patterns (III) Zn-doped HSNs and undoped  $\text{In}_2\text{O}_3$  nanostructures (IV) enlarged view of the XRD patterns, showing a shift towards higher  $2\theta$  value in the Zn-doped HSNs.

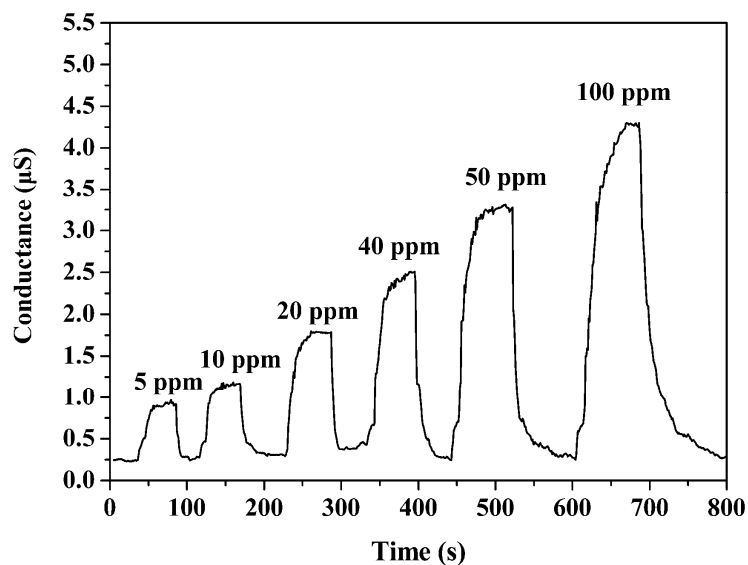

**Fig. S2 Response curve of the undoped  $\text{In}_2\text{O}_3$  gas sensor to formaldehyde with increasing concentration at an operating temperature of  $260^\circ\text{C}$ .**

The relationship between formaldehyde concentrations and the response of the undoped  $\text{In}_2\text{O}_3$  gas sensors in air at  $260^\circ\text{C}$  is depicted in figure S1. Six different concentrations of HCHO, from 5 to 100 ppm, were detected and six cycles were successively recorded. By comparing these sensors, we find that the response of both the Zn-doped gas-sensors was much higher than the undoped sensors with fast response and recovery time, which shows that Zn-doped is playing a crucial role in enhancing the formaldehyde gas-sensor property. The main effect of doping in oxide semiconducting is the introduction of defects into the nanomaterials. And the increased crystal lattice defect of bulk oxide and the stronger electronic interaction between the detected gas and the surface active sites play an important role in enhancing the sensitivity in gas sensors.
